# Partial-Width Injuries of the Rat Rotator Cuff Heal with Fibrosis

**Elisabeth A. Lemmon**

University of Delaware  
Department of Animal and Food Sciences  
and Biomedical Engineering  
5 Innovation Way, Newark, DE 19716  
blemmon@udel.edu

**Ryan C. Locke**

University of Delaware  
Department of Biomedical Engineering  
5 Innovation Way, Newark, DE 19716  
rlocke@udel.edu

**Adrianna K. Szostek**

University of Delaware  
Department of Animal and Food Sciences  
and Biomedical Engineering  
531 South College Avenue Newark, DE 19711  
szostek@udel.edu

**Megan L. Killian, PhD**

University of Delaware  
Department of Biomedical Engineering  
5 Innovation Way, Newark, DE 19716  
killianm@udel.edu

37 **ABSTRACT**

38 **Purpose:** The purpose of this study was to identify the healing outcomes following a partial-width,  
39 full-thickness injury to the rotator cuff tendon-bone attachment and establish if the adult  
40 attachment can regenerate the morphology of the healthy attachment.

41 **Hypothesis:** We hypothesized that a partial-width injury to the attachment would heal via fibrosis  
42 and bone remodeling, resulting in increased cellularity and extracellular matrix deposition, reduced  
43 bone volume, osteoclast presence and decreased collagen organization compared to shams.

44 **Materials and Methods:** A biopsy punch was used to create a partial-width injury at the center  
45 one-third of the rat infraspinatus attachment, and the contralateral limb underwent a sham  
46 operation. Rats were sacrificed at 3- and 8-weeks after injury for analyses. Analyses performed at  
47 each time-point included cellularity (Hematoxylin & Eosin), ECM deposition (Masson's  
48 Trichrome), bone volume (micro-computed tomography; microCT), osteoclast activity (Tartrate  
49 Resistant Acid Phosphatase; TRAP), and collagen fibril organization (Picrosirius Red). Injured  
50 and sham shoulders were compared at both 3- and 8-weeks using paired, two-way ANOVAs with  
51 repeated measures and Sidak's correction for multiple comparisons.

52 **Results:** Cellularity and ECM deposition increased at both 3- and 8-weeks compared to sham  
53 contralateral attachments. Bone volume decreased and osteoclast presence increased at both 3- and  
54 8-weeks compared to sham contralateral limbs. Collagen fibril organization was reduced at 3-  
55 weeks after injury compared to 3-week sham attachments.

56 **Conclusions:** These findings suggest that a partial-width injury to the rotator cuff attachment does  
57 not fully regenerate the native structure of the healthy attachment. The injury model healed via  
58 scar-like fibrosis and did not propagate into a full-width tear after 8-weeks of healing.

59 **Key Words:** rotator cuff healing, tendon injury, tendon-bone attachment, osteoclast, collagen  
60 organization

## 61 INTRODUCTION

62 Rotator cuff tears are a common orthopedic injury, with over 75,000 surgical repairs  
63 performed annually (1). Depending on the location and severity of the tear, clinical  
64 recommendations for surgery and physical therapy vary substantially (2, 3). For partial-width tears,  
65 conservative treatments (e.g., physical therapy) are encouraged before surgical intervention (3-5).  
66 The success of rotator cuff repair depends on the health of the cuff at time of repair (6-10) as well  
67 as the restoration of the morphology and strength of the attachment (11-16). Following full-width  
68 tears, repair of the torn attachment rarely results in full regeneration of the native morphology and  
69 structure of the attachment (6, 14, 17-19). In small animal models of cuff healing, a fibrous scar  
70 tissue, characterized by reduced collagen organization, increased vascularization, and increased  
71 cell density, are often observed (14, 18, 19). Loss of the structural integrity of the attachment is  
72 considered one of the primary causes of high rates of re-injury after rotator cuff repair (6, 19).  
73 However, animal models used to study rotator cuff healing have primarily relied on full-width  
74 injuries that require surgical reattachment of cuff tendons to their bony footprint for structural  
75 reintegration. Healing of cuff tendons during early stages of tear propagation, such as in the case  
76 of partial-width injuries, have been investigated *in vivo* using animal models (19-22). However,  
77 the healing of partial-width injuries focused at the attachment, without surgical repair and  
78 augmentation, have only recently been explored (21).

79 In the present study, we aimed to develop and validate a new model of rotator cuff injury  
80 to investigate the natural healing process of the attachment. Using a rat model of partial-width,  
81 full-thickness injury at the attachment, we hypothesized that, although the attachment would

82 remain partially intact, it would not heal with the same structural quality as an intact, uninjured  
83 attachment. We tested this hypothesis by assessing the fibrotic response, extra-cellular matrix  
84 deposition, bone remodeling, and collagen organization of the healing attachment.

## 85 **MATERIALS AND METHODS**

### 86 **Animal Model**

87 Adult Sprague Dawley rats (N = 8 females, N = 8 males for *in vivo* healing; ~200-250g)  
88 and adult Long Evans rats (N=20 female dams, for *ex vivo* validation at time zero) were used in  
89 accordance with the University of Delaware Institutional Animal Care and Use Committee  
90 approval. Rats underwent a surgical procedure under anesthesia (isoflurane carried by 1% oxygen)  
91 to model a partial-width rotator cuff injury at the center of the IS attachment (Figure 1A-C) (23).  
92 The IS tendon was exposed and the forearm was internally rotated. A 0.3mm diameter biopsy  
93 punch (Robbins, Chatham, NJ, USA) was placed in the center 1/3 of the tendon width spanning  
94 the attachment/bone, and the punch permeated the fibrocartilage, tendon, and cortical bone. The  
95 injured shoulder was randomized between rats, and the contralateral shoulder underwent a sham  
96 operation to mimic the procedure without the biopsy punch permeation. The surgical site was  
97 closed using 5-0 Vicryl suture (Ethicon Inc., Somerville, New Jersey), and rats were given  
98 bupivacaine hydrochloride (0.05 mg/kg) as analgesia. Rats were separated into two groups: 3-  
99 week healing (N=8; 4 females and 4 males) and 8-week healing (N=8, 4 females and 4 males).  
100 Rats were sacrificed with carbon dioxide asphyxiation and thoracotomy. The 3- and 8-week time  
101 points were chosen to evaluate the proliferation (3-week) and remodeling (8-week) phases of  
102 tendon-bone healing.

103

104 **Biomechanics**

105 Validation of the model was evaluated *ex vivo* using biomechanical testing (on N = 18 rats).  
106 Adult, female Long Evans rats, used as breeders in an unrelated study (Department of Psychology  
107 and Brain Sciences), were sacrificed after weaning of their first-born litters. Dams were not treated  
108 with any pharmacological drugs in previous studies. Superficial (through soft tissue/fibrocartilage)  
109 and deep (permeating the cortical bone) injury defects (N = 8-10 shoulders each) were made  
110 evaluating the biomechanical properties of the defect at time zero and establish whether a  
111 superficial or deep defect result in comparable biomechanical outcomes. Rats were randomized as  
112 to which limb received the defect, and the contralateral limb underwent a sham operation to mimic  
113 the procedure, similar to *in vivo* approaches. After performing the punch, the IS tendon-to-bone  
114 attachments were dissected from the surrounding musculature and bone. The IS muscle belly was  
115 detached from the IS fossa of the scapula and the IS tendon attachment at the proximal humerus  
116 was left intact for mechanical testing. Uniaxial tensile tests were performed (Instron 5943,  
117 Norwood, MA) and the cross-sectional area of the attachments were measured using microCT. To  
118 prevent failure at the growth plate during testing, a hole was drilled in the humeral diaphysis and  
119 then steel wire was passed through the hole and wrapped posterior to anterior around the humeral  
120 head. Tendons were tested in a PBS bath using custom fixtures to ensure uniaxial loading. A 0.01N  
121 tare load was applied and the test configuration was imaged at the start of the test to measure gauge  
122 length of the sample, followed by five preconditioning cycles to 5% strain at a rate of 0.2%/sec.  
123 Following preconditioning, samples were held for 30s at initial gauge length and then loaded to  
124 failure at 0.2%/sec. Load/displacement data were recorded throughout the test (preconditioning  
125 and load-to-failure) and data were converted to stress/strain data based on the initial cross-sectional  
126 area from microCT (stress) and the gauge length from the start of the test (strain). Stiffness (N/mm)

127 and ultimate load (N) were calculated from load/displacement curves, and Young's modulus  
128 (MPa) and ultimate stress (MPa) were calculated from stress/strain curves, with stiffness and  
129 Young's modulus as the slope of the respective curves in the linear region and ultimate load/stress  
130 as the maximum load/stress of the respective curves. Data were calculated using MATLAB  
131 (MathWorks, Natick, MA, USA).

### 132 **Micro-Computed Tomography**

133 We validated our injury model via micro-computed tomography (microCT) *ex vivo* to  
134 ensure the correct location of the punch at the attachment at time of injury (Supplemental Figure  
135 1A-F). The shoulder complexes of female Long Evans rats (N = 2 for each group; previously  
136 sacrificed) were used within two hours of sacrifice and unilateral shoulder complexes were  
137 exposed to perform partial-width injuries with the biopsy punch at superficial (through soft  
138 tissue/fibrocartilage) and deep (permeating the cortical bone) intervals. For both validation and *in*  
139 *vivo* healing studies at 3- and 8-week healing, the shoulders were carefully removed to isolate the  
140 IS tendons and corresponding muscles. Humeri were cut at the mid diaphysis distal to the deltoid  
141 tuberosity using bone shears. Shoulders were fixed in their anatomical position in 4%  
142 paraformaldehyde (N = 2 each for control, superficial, and deep injuries for validation studies; N  
143 = 8 each for 3- and 8-week healing time points). Shoulders were scanned in air using microCT  
144 (Scanco  $\mu$ CT35; 20- $\mu$ m voxel size, 45kV, cone beam, 177 $\mu$ A, 800-msec integration time). The  
145 tendon-bone attachments were analyzed for structural quality based on 3-dimensional  
146 reconstructions produced in OsiriX DICOM Viewer (v8.0.2., Pixmeo, Switzerland) and  
147 quantitatively assessed using Scanco software. Bone morphometric properties were quantified for  
148 the 1) entire humeral head and 2) the injury region using total volume (TV), bone volume (BV),  
149 and bone volume/total volume ratio (BV/TV) (Supplemental Figure 2A-B). The humeral head

150 measurements included the humeral head proximal to the growth plate, trabecular bone, and  
151 cortical bone. The injury region measurements comprised the IS tendon-bone region proximal to  
152 the growth plate, including both the trabecular and cortical bone (Scanco, Switzerland).

### 153 **Histology**

154 After microCT, shoulders were decalcified in 14% EDTA (Sigma-Aldrich, St. Louis, MO,  
155 USA) and processed for paraffin sectioning. Attachments were sectioned at 6 $\mu$ m thickness and  
156 stained using Hematoxylin & Eosin (H&E) for cellular density, Picrosirius Red for collagen  
157 organization, Masson's Trichrome for fibrosis and extra-cellular matrix (ECM) localization, and  
158 Tartrate Resistant Acid Phosphatase (TRAP) for osteoclast staining. Stained sections were imaged  
159 using an epifluorescent microscope (Axio.Observer. Z1, Carl Zeiss, Thornwood, NY). Cell density  
160 within the attachment was measured using a custom MATLAB code on a similarly sized region of  
161 interest between samples (MATLAB, Supplemental Figure 3A-B') (24). Sections stained with  
162 Picrosirius Red were imaged using circular polarized light microscopy, and the deviation of  
163 aligned collagen fibrils was evaluated using a custom MATLAB code (Supplemental Figure 4A-  
164 B) (25). TRAP-stained sections were analyzed using Osteomeasure software (Ostometrics,  
165 Decatur, GA, USA) to quantify osteoclast surface area at the injury site (Oc.S.) relative to the total  
166 bone surface area (B.S.).

### 167 **Statistical Analyses**

168 All statistical comparisons were performed using Prism (v7.0, Graphpad, La Jolla,  
169 California, USA). To determine if sex differences influenced our microCT outcomes, an ordinary  
170 three-way ANOVA was performed (injury, sex, and time point) with a Tukey multiple  
171 comparisons test. If sex had very little impact, we consolidated the data for comparisons using a  
172 two-way ANOVA. Within animal comparisons for humeral head BV/TV, injury region BV/TV,

173 cell density, Picrosirius Red circular standard deviations, and Oc.S./B.S were analyzed using two-  
174 way ANOVAs (3wk vs. 8wk) with repeated measures (sham vs. injured) and Sidak's correction  
175 for multiple comparisons. All quantitative data are presented as mean  $\pm$  95% confidence intervals  
176 (CI).

## 177 **RESULTS**

178 Based on validation biomechanical results, we performed the deep injury *in vivo* instead of  
179 the superficial injury, as the deep injury resulted in significant decreases in stiffness, Young's  
180 modulus, ultimate load, and ultimate stress compared to the uninjured control (Supplemental  
181 Figure 1). The superficial injury did not lead to significant differences in biomechanical properties  
182 compared to uninjured controls (Supplemental Figure 1).

### 183 **Gross Observations**

184 At the time of dissection for both the 3- and 8-week time points, the injured attachments  
185 were intact and none of the injuries had developed into full-width tears. No obvious morphometric  
186 differences were observed between the injured and sham muscle bellies or humeral heads. Gross  
187 examination of the healed injury site indicated increased fibrosis of the fascia surrounding IS  
188 tendon-bone attachments.

### 189 **Micro-Computed Tomography**

190 Sex did not have a significant impact on the bone morphometry outcomes, and therefore  
191 we consolidated sex as a variable for two-way ANOVA (factors: side and time point with repeated  
192 measures of side). Similar to our validation results, which showed that the deep injury permeated  
193 the cortical bone at time zero, the *in vivo* deep injury permeated the cortical and trabecular bone at  
194 the IS attachment, which did not return to its normal morphology by 8-weeks post injury (Figure  
195 2A-F). As visualized in microCT reconstructions, 3-week injured attachments showed reduced



196 amount of bone at the defect site; by 8-weeks post-injury, the defect was mineralized, although  
197 this remodeling was incomplete (Figure 2C & F). Quantitatively, humeral head BV/TV was  
198 significantly lower at both 3- and 8-weeks for the injured groups compared to the sham groups  
199 (combined male and female groups, Figure 2G). In addition, BV/TV increased with age of the rat  
200 for both male and female rats, regardless of injury group (Figure 2G).

201 The injury region had significantly reduced BV/TV in at 3-week post-injury compared to  
202 the 8-week injured group (Figure 2H). There were no significant differences in injury region  
203 BV/TV between the 3- and 8-week sham (Figure 2H). Measurements for both the humeral head  
204 total volume of the attachments as well as injury region total volume were not significantly  
205 different across all groups (Supplemental Figure 2C-D).

## 206 **Histology**

207 Qualitatively, the injured attachments showed increased ECM deposition and decreased  
208 collagen organization, as seen using histological imaging. At 3-week post-injury, increased ECM  
209 deposition (shown in red+ staining) was apparent compared to sham attachments (Figure 3B-B').  
210 At 8-weeks, the injured attachments had increased evidence of fibrovascular scar tissue in addition  
211 to fatty infiltration of the tendon compared to sham attachments (Figure 3D-D'). Collagen  
212 production/remodeling was apparent, indicated by the blue+ stain, at both 3- and 8-weeks after  
213 injury (Figure 3B' and Figure 3D').

214 At 3-week post-injury, the attachments appeared unorganized and/or had non-existent  
215 organized collagen at the injury site (Figure 3A'). Sham attachments at both 3- and 8-weeks had  
216 organized collagen (yellow) at the tendon-bone attachment, with a clear transition in organization  
217 between tendon and bone (Figure 3A and Figure 3C). At 8-weeks post-injury, attachments  
218 demonstrated evidence of re-organization of collagen at the injury site compared to the 3-week

219 injured attachments (Figure 3C'). The 3-week injured attachments had, quantitatively, decreased  
220 collagen organization compared to sham attachments (Figure 3E).

221 TRAP-positive osteoclasts were prevalent at the injured attachment, indicating an increase  
222 in bone remodeling at both 3- and 8-weeks (Figure 4A-D'). Injured attachments had increased  
223 Oc.S./B.S. at 3- and 8-weeks compared to the contralateral sham attachments (Figure 4F).  
224 Oc.S./B.S. was significantly higher in the injured 3-week attachments compared to the injured 8-  
225 week attachments (Figure 4F). There was no significant difference in Oc.S./B.S. for 3-week sham  
226 attachments compared to 8wk injured attachments. The overall cell density was significantly  
227 higher for both time points at the injured tendon-bone attachments compared to the sham  
228 attachments (Figure 4E).

## 229 **DISCUSSION**

### 230 **Overview**

231 The structure of the healthy tendon-bone attachment is ideal for its function to transmit forces  
232 generated by muscle to bone (23, 25-27). Although the attachment resists failure, injuries  
233 commonly occur near the attachment within rotator cuff tendons (6, 17, 28-30). Rotator cuff tears  
234 may necessitate surgical repair of the tendon back to bone, however conservative treatments can  
235 also be effective in reestablishing cuff strength and health (2, 31-35). In the present study, we  
236 investigated cuff healing using a new model of partial width injury model in the rat.

237 Here, we used this newly-established injury model of a partial-width rotator cuff defect to  
238 quantitatively and qualitatively investigate the morphological properties of the healing attachment  
239 at 3- and 8-weeks post-injury.

240

## 241 **Study Significance**

242           In this study, we showed that partial-width, full-thickness injuries led to substantial deficits  
243 in cellular and structural composition, including impaired collagen alignment, increased osteoclast  
244 activity, and decreased bone volume compared to sham-operated attachments. These data support  
245 that healing of the mature tendon-bone attachment is scar-mediated, coinciding with previous work  
246 (21). In our study, short-term following injury (3-weeks) led to decreased collagen organization  
247 compared to uninjured groups, yet the attachment was able to somewhat overcome this deficit in  
248 the longer term (i.e., by 8-weeks post injury). This suggests that the attachment continues to  
249 remodel and re-organize the injury site. Notably, the biopsy punch used to create the injury  
250 permeated the cortical bone, which may have resulted in increased osteoclast activity at the injury  
251 site, indicative of a bone-marrow derived healing response (21, 36). The observed increase in bone  
252 resorption, driven by osteoclast activity, likely led to reduced BV/TV in the injured groups at 3-  
253 and 8-weeks post-injury. Additionally, the injury may have led to reduced loading, due to pain or  
254 discomfort, resulting in a reduction in muscle forces transmitted to bone, which could have also  
255 contributed to the decreased BV/TV that we observed (8). Reduced muscle loading of the tendon-  
256 bone attachment is detrimental to tendon-bone healing (7, 8), yet it remains unknown if a partial-  
257 width injury to the tendon-bone attachment influences the muscle loading of the attachment in our  
258 model. Per our *ex vivo* validation studies, the injured attachments likely have decreased  
259 biomechanical properties at time of injury due to loss of structural integrity and removal of  
260 attachment tissue. Interestingly, none of the partial-width injuries resulted in a full-width injury,  
261 supporting recent evidence that the attachment may resist failure even when damaged, albeit less  
262 so than a healthy attachment (23). Therefore, although full regeneration of the structure of the

263 tendon-bone attachment was not observed, the scar tissue formed at the injury-site may be  
264 mechanically sufficient to resist tear propagation.

## 265 **Research Significance**

266 Although tear propagation was not observed in this study, rotator cuff tears in the clinic  
267 may propagate into full-width injuries that require surgical repair (37-39). Therefore, partial  
268 injuries to rotator cuff tendons are sometimes surgically repaired to prevent tear propagation (17,  
269 28). Hence, many studies have aimed to understand tear propagation (23, 38-41) and various  
270 scenarios of rotator cuff repair (6, 17, 28-30, 33, 42-46). Despite the plethora of research in the  
271 field of rotator cuff repair, repairs often fail due to poor re-integration of tendon to bone (6, 47).  
272 As such, studies of attachment healing have focused on tissue-engineering approaches for  
273 improving attachment repair and establishing the mechanical and biological factors that are  
274 involved in repair healing (7-9, 14, 18, 19, 21, 22, 31-33, 36, 48-61). Few studies have investigated  
275 the innate healing response of the attachment (i.e., attachment healing without repair). One such  
276 study identifies a role of Gli1+ cells, key regulators of attachment development, in attachment  
277 regeneration via direct punch-like injury to neonatal mouse attachments (21). Although these cells  
278 mediate neonate regeneration, Gli1+ cells were scarce during scar-mediated healing in the mature  
279 attachment (21). Interestingly, scar-mediated healing has been shown to occur both in the mature  
280 mouse and in our rat model of healing, indicating that aging may limit the capabilities for tissue  
281 regeneration, regardless of species. The results of our study are consistent with other animal  
282 models of rotator cuff injury (7, 8, 10, 18, 19, 54, 62), elucidating that the composition of the  
283 attachment varies at different time points after an acute injury. In one study of acute rotator cuff  
284 tendon injury and repair, attachments exhibited a wound healing response with a lack of restoration  
285 achievable compared to uninjured shoulders (14). Only a few studies, however, have focused on

286 the healing composition of partial-width injuries without repair or augmentation (19). In this study,  
287 we established that a model of partial-width rotator cuff injury in the rat shoulder leads to  
288 achievable restoration, although scar-like and fibrotic, at the attachment without surgical repair.

### 289 **Clinical Significance**

290 An increased understanding of the healing properties of partial-width rotator cuff injuries  
291 are necessary to establish optimal treatment plans for patients with these injuries. The small-animal  
292 injury model presented here will be beneficial in determining the innate healing properties of the  
293 attachment, which can contribute to pharmacological interventions or treatment protocols for  
294 partial-width tears.

### 295 **Limitations**

296 This clinical relevancy of this model is somewhat limited, as most partial-width tears reside  
297 on the bursal side of the attachment and include the lateral attachments of the tendon to bone (18,  
298 32, 33). However, this model is useful to evaluate the injury and healing characteristics of the  
299 attachment, directly. Additionally, in this model, the punch biopsy permeated the cortical bone of  
300 the humeral head and removed a portion of bone, which could be contribute to the loss of BV/TV  
301 in the injured attachments compared to the sham operated attachments. Furthermore, the  
302 differences in time points and sex among the rats may contribute to slight variations in the healing  
303 of the attachments. The discrepancy between the BV/TV for the entire humeral head and injury  
304 region may be due to the sensitivity of the threshold parameters of the microCT software, resulting  
305 in undeveloped or less dense bone not being distinguished. Lastly, biomechanical testing was not  
306 performed for this injury *in vivo*. Thus, the strength of the integrity of the attachment is unknown,  
307 despite decreased structural quality at the injury site of the attachment after healing.

308

309 **Conclusions**

310 A partial-width, full-thickness injury to the IS attachment of the rotator cuff compromises  
311 the quality of the attachment. This study established the structural quality of the attachment  
312 following healing in a new rodent model. Proliferation and remodeling of the attachment during  
313 healing resulted in attachments that were structurally inferior compared to an uninjured attachment  
314 even after 8-weeks of healing. This study contributes a novel *in vivo* injury of a partial-width, full-  
315 thickness rotator cuff injury that can be used as the basis for further research to evaluate healing  
316 properties and tear propagation of the attachment with moderate to vigorous exercise,  
317 immobilization, or pharmacological interventions.

318 **FUNDING**

319 Funding for this research was supported by the University of Delaware Research  
320 Foundation (UDRF 16A01396), the Delaware Space Grant Consortium (DESGC NNX15AI19H),  
321 the Eunice Kennedy Shriver National Institute of Child Health & Human Development of the  
322 National Institutes of Health (K12HD073945), the State of Delaware, and the Delaware INBRE  
323 program (8 P20 GM103446-16).

324 **ACKNOWLEDGEMENTS**

325 We acknowledge Terry Kokas, Histology Specialist III (Nemours-A.I. duPont Hospital for  
326 Children Histochemistry and Tissue Processing Core; supported by NIH-NIGMS: P20 GM103446  
327 and the state of Delaware) and Crystal Idleburg, HT (ASCP) (Washington University  
328 Musculoskeletal Research Center, NIH NIAMS: P30 AR057235) for assistance with histology.  
329 The injury illustration (Figure 1A) was created by Katelyn McDonald, MA, CMI (Certified  
330 Medical Illustrator). Elahe Ganji assisted in creating the three-dimensional reconstructions of the  
331 injury model.

332 **Declaration of Interest:** There are no conflicts of interest to report.

333 **REFERENCES**

- 334 1. Vitale MA, Vitale MG, Zivin JG, Braman JP, Bigliani LU, Flatow EL. Rotator cuff repair:  
335 An analysis of utility scores and cost-effectiveness. *Journal of Shoulder and Elbow Surgery*.  
336 2007;16(2):181-7.
- 337 2. Dunn WR, Kuhn JE, Sanders R, An Q, Baumgarten KM, Bishop JY, et al. 2013 Neer  
338 Award: predictors of failure of nonoperative treatment of chronic, symptomatic, full-thickness  
339 rotator cuff tears. *J Shoulder Elbow Surg*. 2016;25(8):1303-11.
- 340 3. Li S, Sun H, Luo X, Wang K, Wu G, Zhou J, et al. The clinical effect of rehabilitation  
341 following arthroscopic rotator cuff repair: A meta-analysis of early versus delayed passive motion.  
342 *Medicine*. 2018;97(2):e9625.
- 343 4. Bong Young K, Minjoon C, Hwa Ryeong L, Young Eun C, Sae Hoon K. Structural  
344 Evolution of Nonoperatively Treated High-Grade Partial-Thickness Tears of the Supraspinatus  
345 Tendon. 2017:0363546517729164.
- 346 5. Frisch KE, Marcu D, Baer GS, Thelen DG, Vanderby R. The influence of partial and full  
347 thickness tears on infraspinatus tendon strain patterns. *Journal of Biomechanical Engineering*.  
348 2014;136(5):051004.
- 349 6. Galatz LM, Ball CM, Teefey SA, Middleton WD, Yamaguchi K. The outcome and repair  
350 integrity of completely arthroscopically repaired large and massive rotator cuff tears. *The Journal*  
351 *of Bone and Joint Surgery, American volume*. 2004;86-A(2):219-24.
- 352 7. Galatz LM, Charlton N, Das R, Kim HM, Havlioglu N, Thomopoulos S. Complete removal  
353 of load is detrimental to rotator cuff healing. *Journal of Shoulder and Elbow Surgery*.  
354 2009;18(5):669-75.

- 355 8. Killian ML, Cavinatto L, Shah SA, Sato EJ, Ward SR, Havlioglu N, et al. The effects of  
356 chronic unloading and gap formation on tendon-to-bone healing in a rat model of massive rotator  
357 cuff tears. *Journal of Orthopaedic Research*. 2014;32(3):439-47.
- 358 9. Sato E, Killian M, Choi A, Lin E, Choo A, Rodriguez-Soto A, et al. Architectural and  
359 biochemical adaptations in skeletal muscle and bone following rotator cuff injury in a rat model.  
360 *Journal of Bone and Joint Surgery*. 2015;97(7):565-73.
- 361 10. Cavinatto L, Malavolta EA, Pereira CAM, Miranda-Rodrigues M, Silva LCM, Gouveia  
362 CH, et al. Early versus late repair of rotator cuff tears in rats. *Journal of Shoulder and Elbow  
363 Surgery*. 2017.
- 364 11. Mellado JM, Calmet J, Olona M, Esteve C, Camins A, Pérez del Palomar L, et al.  
365 Surgically Repaired Massive Rotator Cuff Tears: MRI of Tendon Integrity, Muscle Fatty  
366 Degeneration, and Muscle Atrophy Correlated with Intraoperative and Clinical Findings.  
367 *American Journal of Roentgenology*. 2005;184(5):1456-63.
- 368 12. Chung SW, Oh JH, Gong HS, Kim JY, Kim SH. Factors Affecting Rotator Cuff Healing  
369 After Arthroscopic Repair. *The American Journal of Sports Medicine*. 2011;39(10):2099-107.
- 370 13. Kim Y-K, Jung K-H, Kim J-W, Kim U-S, Hwang D-H. Factors affecting rotator cuff  
371 integrity after arthroscopic repair for medium-sized or larger cuff tears: a retrospective cohort  
372 study. *Journal of shoulder and elbow surgery*. 2017.
- 373 14. Galatz LM, Sandell LJ, Rothermich SY, Das R, Mastny A, Havlioglu N, et al.  
374 Characteristics of the rat supraspinatus tendon during tendon-to-bone healing after acute injury.  
375 *Journal of Orthopaedic Research*. 2006;24(3):541-50.
- 376 15. Park JS, Park HJ, Kim SH, Oh JH. Prognostic Factors Affecting Rotator Cuff Healing After  
377 Arthroscopic Repair in Small to Medium-sized Tears. *Am J Sports Med*. 2015;43(10):2386-92.



- 378 16. Kim KC, Shin HD, Lee WY. Repair integrity and functional outcomes after arthroscopic  
379 suture-bridge rotator cuff repair. *J Bone Joint Surg Am.* 2012;94(8):e48.
- 380 17. Boileau P, Brassart N, Watkinson DJ, Carles M, Hatzidakis AM, Krishnan SG.  
381 Arthroscopic repair of full-thickness tears of the supraspinatus: does the tendon really heal? *The*  
382 *Journal of Bone and Joint Surgery, American Volume.* 2005;87(6):1229-40.
- 383 18. Thomopoulos S, Williams GR, Soslowky LJ. Tendon to bone healing: differences in  
384 biomechanical, structural, and compositional properties due to a range of activity levels. *Journal*  
385 *of Biomechanical Engineering.* 2003;125(1):106-13.
- 386 19. Carpenter JE, Thomopoulos S, Flanagan CL, DeBano CM, Soslowky LJ. Rotator cuff  
387 defect healing: a biomechanical and histologic analysis in an animal model. *Journal of Shoulder*  
388 *and Elbow Surgery.* 1998;7(6):599-605.
- 389 20. Derwin KA, Baker AR, Codsí MJ, Iannotti JP. Assessment of the canine model of rotator  
390 cuff injury and repair. *Journal of shoulder and elbow surgery / American Shoulder and Elbow*  
391 *Surgeons [et al].* 2007;16(5 Suppl):S140-S8.
- 392 21. Schwartz AG, Galatz LM, Thomopoulos S. Enthesis regeneration: a role for Gli1+  
393 progenitor cells. *Development (Cambridge, England).* 2017;144(7):1159-64.
- 394 22. Derwin KA, Codsí MJ, Milks RA, Baker AR, McCarron JA, Iannotti JP. Rotator cuff repair  
395 augmentation in a canine model with use of a woven poly-L-lactide device. *The Journal of Bone*  
396 *and Joint Surgery, American Volume.* 2009;91(5):1159-71.
- 397 23. Locke RC, Peloquin JM, Lemmon EA, Szostek A, Elliott DM, Killian ML. Strain  
398 Distribution of Intact Rat Rotator Cuff Tendon-to-Bone Attachments and Attachments With  
399 Defects. *Journal of Biomechanical Engineering.* 2017;139(11):10.1115/1.4038111.

- 400 24. David MA, Smith MK, Pilachowski RN, White AT, Locke RC, Price C. Early, focal  
401 changes in cartilage cellularity and structure following surgically induced meniscal destabilization  
402 in the mouse. *Journal of Orthopaedic Research*. 2017;35(3):537-47.
- 403 25. Thomopoulos S, Marquez JP, Weinberger B, Birman V, Genin GM. Collagen fiber  
404 orientation at the tendon to bone insertion and its influence on stress concentrations. *J Biomech*.  
405 2006;39(10):1842-51.
- 406 26. Rossetti L, Kuntz LA, Kunold E, Schock J, Muller KW, Grabmayr H, et al. The  
407 microstructure and micromechanics of the tendon-bone insertion. *Nat Mater*. 2017;16(6):664-70.
- 408 27. Kanazawa T, Gotoh M, Ohta K, Shiba N, Nakamura K. Novel characteristics of normal  
409 supraspinatus insertion in rats: an ultrastructural analysis using three-dimensional reconstruction  
410 using focused ion beam/scanning electron microscope tomography. *Muscles Ligaments Tendons*  
411 *J*. 2014;4(2):182-7.
- 412 28. Lo IKY, Burkhart SS. Double-row arthroscopic rotator cuff repair: re-establishing the  
413 footprint of the rotator cuff. *Arthroscopy: The Journal of Arthroscopic & Related Surgery: Official*  
414 *Publication of the Arthroscopy Association of North America and the International Arthroscopy*  
415 *Association*. 2003;19(9):1035-42.
- 416 29. Tashjian RZ, Hollins AM, Kim HM, Teefey SA, Middleton WD, Steger-May K, et al.  
417 Factors affecting healing rates after arthroscopic double-row rotator cuff repair. *The American*  
418 *Journal of Sports Medicine*. 2010;38(12):2435-42.
- 419 30. Thomopoulos S, Parks WC, Rifkin DB, Derwin KA. Mechanisms of tendon injury and  
420 repair. *Journal of Orthopaedic Research*. 2015;33(6):832-9.
- 421 31. Ji X, Chen Q, Thoreson AR, Qu J, An K-N, Amadio PC, et al. Rotator cuff repair with a  
422 tendon-fibrocartilage-bone composite bridging patch. *Clinical Biomechanics*. 2015;30(9):976-80.

- 423 32. Lewington MR, Ferguson DP, Smith TD, Burks R, Coady C, Wong IH-B. Graft Utilization  
424 in the Bridging Reconstruction of Irreparable Rotator Cuff Tears: A Systematic Review. The  
425 American Journal of Sports Medicine. 2017;45(13):3149-57.
- 426 33. Ostrander RV, Klauser JM, Menon S, Hackel JG. Ultrasound and Functional Assessment  
427 of Transtendinous Repairs of Partial-Thickness Articular-Sided Rotator Cuff Tears. Orthopaedic  
428 Journal of Sports Medicine. 2017;5(3):2325967117697375.
- 429 34. Goldberg BA, Nowinski RJ, Matsen FA, 3rd. Outcome of nonoperative management of  
430 full-thickness rotator cuff tears. Clin Orthop Relat Res. 2001(382):99-107.
- 431 35. Zingg PO, Jost B, Sukthankar A, Buhler M, Pfirrmann CW, Gerber C. Clinical and  
432 structural outcomes of nonoperative management of massive rotator cuff tears. J Bone Joint Surg  
433 Am. 2007;89(9):1928-34.
- 434 36. Nakagawa H, Morihara T, Fujiwara H, Kabuto Y, Sukenari T, Kida Y, et al. Effect of  
435 Footprint Preparation on Tendon-to-Bone Healing: A Histologic and Biomechanical Study in a  
436 Rat Rotator Cuff Repair Model. Arthroscopy: The Journal of Arthroscopic & Related Surgery:  
437 Official Publication of the Arthroscopy Association of North America and the International  
438 Arthroscopy Association. 2017;33(8):1482-92.
- 439 37. Reilly P, Amis AA, Wallace AL, Emery RJH. Mechanical factors in the initiation and  
440 propagation of tears of the rotator cuff. Quantification of strains of the supraspinatus tendon in  
441 vitro. The Journal of Bone and Joint Surgery British Volume. 2003;85(4):594-9.
- 442 38. Reilly P, Amis AA, Wallace AL, Emery RJH. Supraspinatus tears: propagation and strain  
443 alteration. Journal of Shoulder and Elbow Surgery. 2003;12(2):134-8.

- 444 39. Miller RM, Fujimaki Y, Araki D, Musahl V, Debski RE. Strain distribution due to  
445 propagation of tears in the anterior supraspinatus tendon. *Journal of Orthopaedic Research*.  
446 2014;32:1283-9.
- 447 40. Andarawis-Puri N, Kuntz AF, Kim S-Y, Soslowsky LJ. Effect of anterior supraspinatus  
448 tendon partial-thickness tears on infraspinatus tendon strain through a range of joint rotation  
449 angles. *Journal of Shoulder and Elbow Surgery*. 2010;19(4):617-23.
- 450 41. Andarawis-Puri N, Ricchetti ET, Soslowsky LJ. Rotator cuff tendon strain correlates with  
451 tear propagation. *J Biomech*. 2009;42(2):158-63.
- 452 42. Derwin KA, Baker AR, Spragg RK, Leigh DR, Iannotti JP. Commercial extracellular  
453 matrix scaffolds for rotator cuff tendon repair. Biomechanical, biochemical, and cellular  
454 properties. *The Journal of Bone and Joint Surgery, American Volume*. 2006;88(12):2665-72.
- 455 43. Derwin KA, Badylak SF, Steinmann SP, Iannotti JP. Extracellular matrix scaffold devices  
456 for rotator cuff repair. *Journal of Shoulder and Elbow Surgery*. 2010;19(3):467-76.
- 457 44. Barber FA, Burns JP, Deutsch A, Labbé MR, Litchfield RB. A prospective, randomized  
458 evaluation of acellular human dermal matrix augmentation for arthroscopic rotator cuff repair.  
459 *Arthroscopy: The Journal of Arthroscopic & Related Surgery*. 2012;28(1):8-15.
- 460 45. Yang G, Rothrauff BB, Tuan RS. Tendon and ligament regeneration and repair: clinical  
461 relevance and developmental paradigm. *Birth Defects Research Part C, Embryo Today: Reviews*.  
462 2013;99(3):203-22.
- 463 46. Thangarajah T, Pendegrass CJ, Shahbazi S, Lambert S, Alexander S, Blunn GW.  
464 Augmentation of Rotator Cuff Repair With Soft Tissue Scaffolds. *Orthopaedic Journal of Sports  
465 Medicine*. 2015;3(6):2325967115587495.

- 466 47. Kim HM, Dahiya N, Teefey SA, Middleton WD, Stobbs G, Steger-May K, et al. Location  
467 and initiation of degenerative rotator cuff tears: an analysis of three hundred and sixty shoulders.  
468 *The Journal of Bone and Joint Surgery, American Volume*. 2010;92(5):1088-96.
- 469 48. Li X, Xie J, Lipner J, Yuan X, Thomopoulos S, Xia Y. Nanofiber scaffolds with gradations  
470 in mineral content for mimicking the tendon-to-bone insertion site. *Nano Letters*. 2009;9(7):2763-  
471 8.
- 472 49. Gulotta LV, Kovacevic D, Packer JD, Deng XH, Rodeo SA. Bone marrow-derived  
473 mesenchymal stem cells transduced with scleraxis improve rotator cuff healing in a rat model. *The*  
474 *American Journal of Sports Medicine*. 2011;39(6):1282-9.
- 475 50. Gulotta LV, Kovacevic D, Packer JD, Ehteshami JR, Rodeo SA. Adenoviral-mediated  
476 gene transfer of human bone morphogenetic protein-13 does not improve rotator cuff healing in a  
477 rat model. *The American Journal of Sports Medicine*. 2011;39(1):180-7.
- 478 51. Zhao S, Zhao J, Dong S, Huangfu X, Li B, Yang H, et al. Biological augmentation of  
479 rotator cuff repair using bFGF-loaded electrospun poly(lactide-co-glycolide) fibrous membranes.  
480 *International Journal of Nanomedicine*. 2014;9:2373-85.
- 481 52. Peterson DR, Ohashi KL, Aberman HM, Piza PA, Crockett HC, Fernandez JI, et al.  
482 Evaluation of a collagen-coated, resorbable fiber scaffold loaded with a peptide basic fibroblast  
483 growth factor mimetic in a sheep model of rotator cuff repair. *Journal of Shoulder and Elbow*  
484 *Surgery*. 2015;24(11):1764-73.
- 485 53. Degen RM, Carbone A, Carballo C, Zong J, Chen T, Lebaschi A, et al. The Effect of  
486 Purified Human Bone Marrow-Derived Mesenchymal Stem Cells on Rotator Cuff Tendon Healing  
487 in an Athymic Rat. *Arthroscopy: The Journal of Arthroscopic & Related Surgery*.  
488 2016;32(12):2435-43.

- 489 54. Kanazawa T, Gotoh M, Ohta K, Honda H, Ohzono H, Shimokobe H, et al.  
490 Histomorphometric and ultrastructural analysis of the tendon-bone interface after rotator cuff  
491 repair in a rat model. *Scientific Reports*. 2016;6:33800.
- 492 55. Omi R, Gingery A, Steinmann SP, Amadio PC, An K-N, Zhao C. Rotator cuff repair  
493 augmentation in a rat model that combines a multilayer xenograft tendon scaffold with bone  
494 marrow stromal cells. *Journal of Shoulder and Elbow Surgery*. 2016;25(3):469-77.
- 495 56. Ye C, Zhang W, Wang S, Jiang S, Yu Y, Chen E, et al. Icariin Promotes Tendon-Bone  
496 Healing during Repair of Rotator Cuff Tears: A Biomechanical and Histological Study.  
497 *International Journal of Molecular Sciences*. 2016;17(11).
- 498 57. Shah SA, Kormpakis I, Havlioglu N, Ominsky MS, Galatz LM, Thomopoulos S. Sclerostin  
499 Antibody Treatment Enhances Rotator Cuff Tendon-to-Bone Healing in an Animal Model. *The*  
500 *Journal of Bone and Joint Surgery American Volume*. 2017;99(10):855-64.
- 501 58. Sato E, Killian M, Choi A, Lin E, Esparza M, Galatz L, et al. Skeletal muscle fibrosis and  
502 stiffness increase after rotator cuff tendon injury and neuromuscular compromise in a rat model.  
503 *Journal of Orthopaedic Research*. 2014;32(9):1111-6.
- 504 59. Wildemann B, Klatt F. Biological aspects of rotator cuff healing. *Muscles, Ligaments and*  
505 *Tendons Journal*. 2011;1(4):161-8.
- 506 60. Thomopoulos S, Hattersley G, Rosen V, Mertens M, Galatz L, Williams GR, et al. The  
507 localized expression of extracellular matrix components in healing tendon insertion sites: an in situ  
508 hybridization study. *Journal of Orthopaedic Research*. 2002;20(3):454-63.
- 509 61. Soslowsky LJ, Carpenter JE, DeBano CM, Banerji I, Moalli MR. Development and use of  
510 an animal model for investigations on rotator cuff disease. *Journal of Shoulder and Elbow Surgery*.  
511 1996;5(5):383-92.

512 62. Killian ML, Cavinatto LM, Ward SR, Havlioglu N, Thomopoulos S, Galatz LM. Chronic  
513 Degeneration Leads to Poor Healing of Repaired Massive Rotator Cuff Tears in Rats. The  
514 American Journal of Sports Medicine. 2015;43(10):2401-10.

515

516

517

518

519

520

521

522

523

524

525

526

527

528

529

530

531

532

533

534

535

536

537

538

539

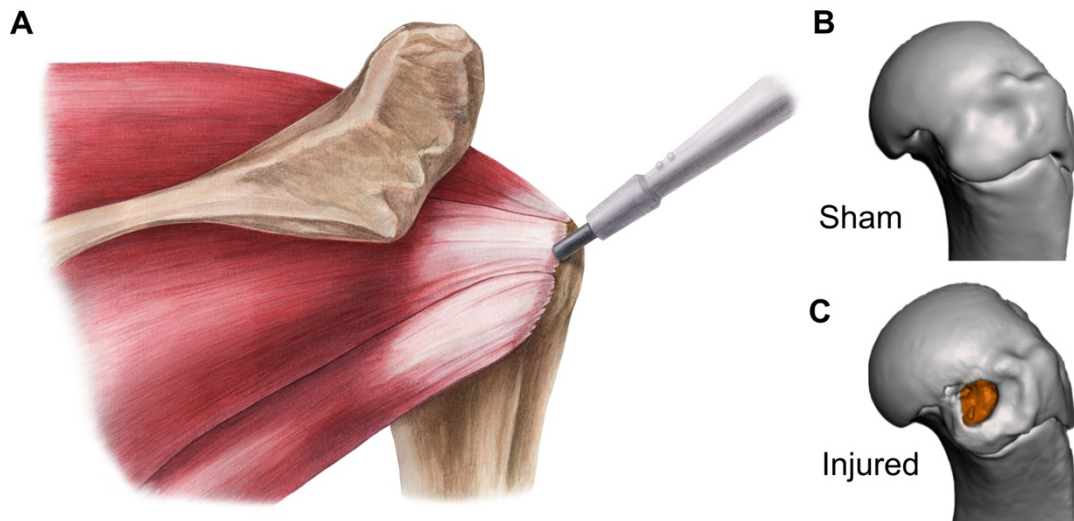

540

541 Figure 1. Rotator cuff infraspinatus injury model and microCT reconstructions of sham and  
542 injured groups. (A) Illustration of the human rotator cuff muscle groups. In our animal model, a  
543 0.3mm circular injury was made at the center of the infraspinatus attachment. MicroCT renders  
544 of (B) sham and (C) injured humeral heads. The orange region is the injury location.

545

546

547

548

549

550

551

552



553

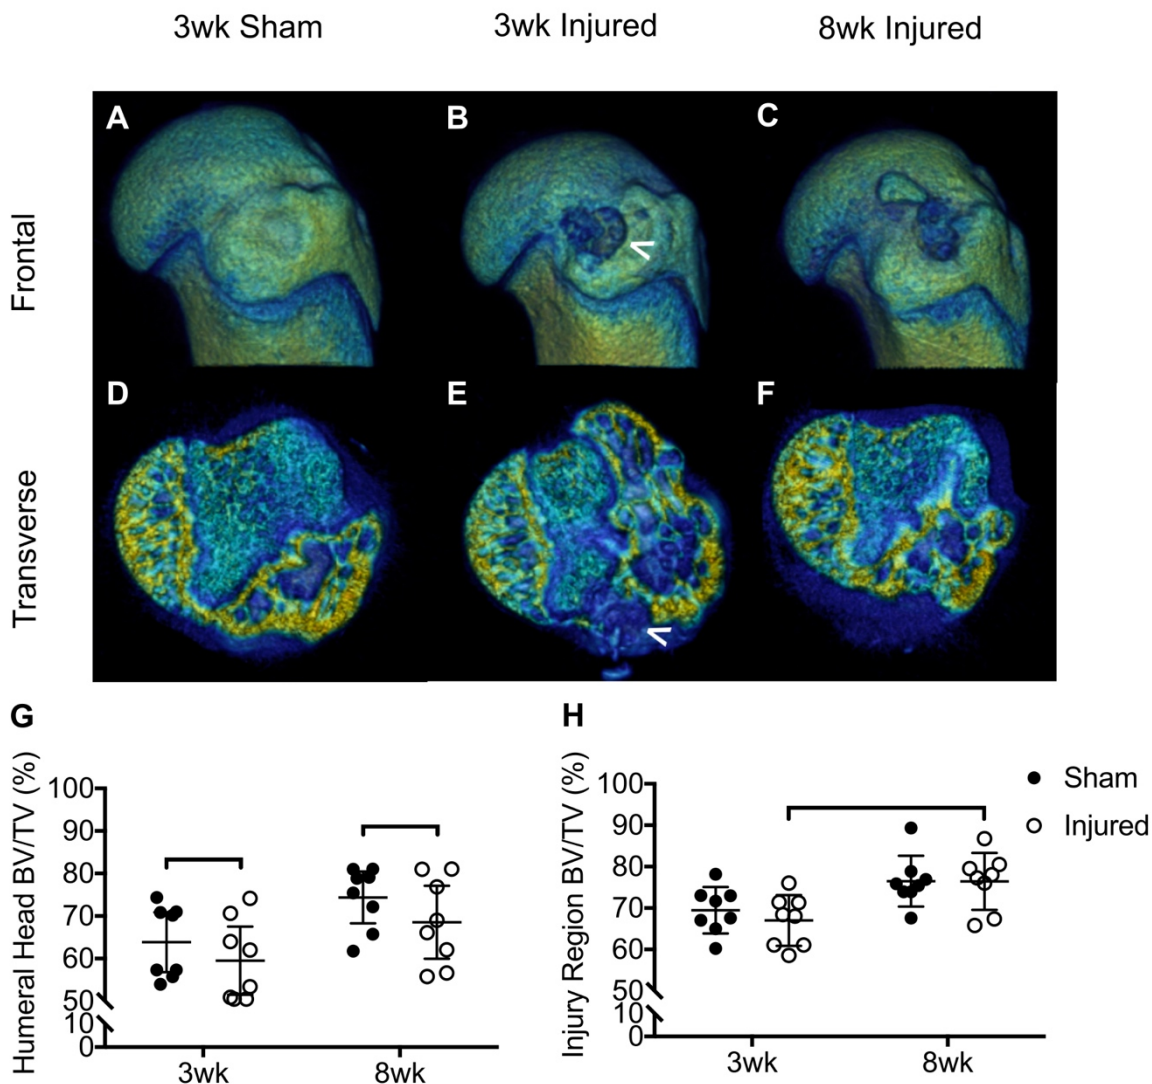

554

555 Figure 2. Humeral head BV/TV was significantly reduced in injured attachments compared to  
556 the sham forearms for both time points. (A-F) MicroCT reconstructions of sham and injured  
557 forearms at 3- and 8-weeks. (A-C) Frontal plane views of microCT reconstructions showing the  
558 IS ridge of the humeral head for (A) 3wk sham, (B) 3wk injured, and (C) 8wk injured  
559 attachments. (D-F) Transverse cut-plane (D) 3wk sham, (E) 3wk injured, and (F) 8wk injured.  
560 White arrowheads: Cortical bone injury in the injury region. (G) Humeral head BV/TV, (H)  
561 Injury region BV/TV for 3wk control, 3wk injured, 8wk control, and 8wk injured attachments.  
562 Bars indicate significant differences between groups ( $p < 0.05$ , mean  $\pm$  95% CI).

563

564

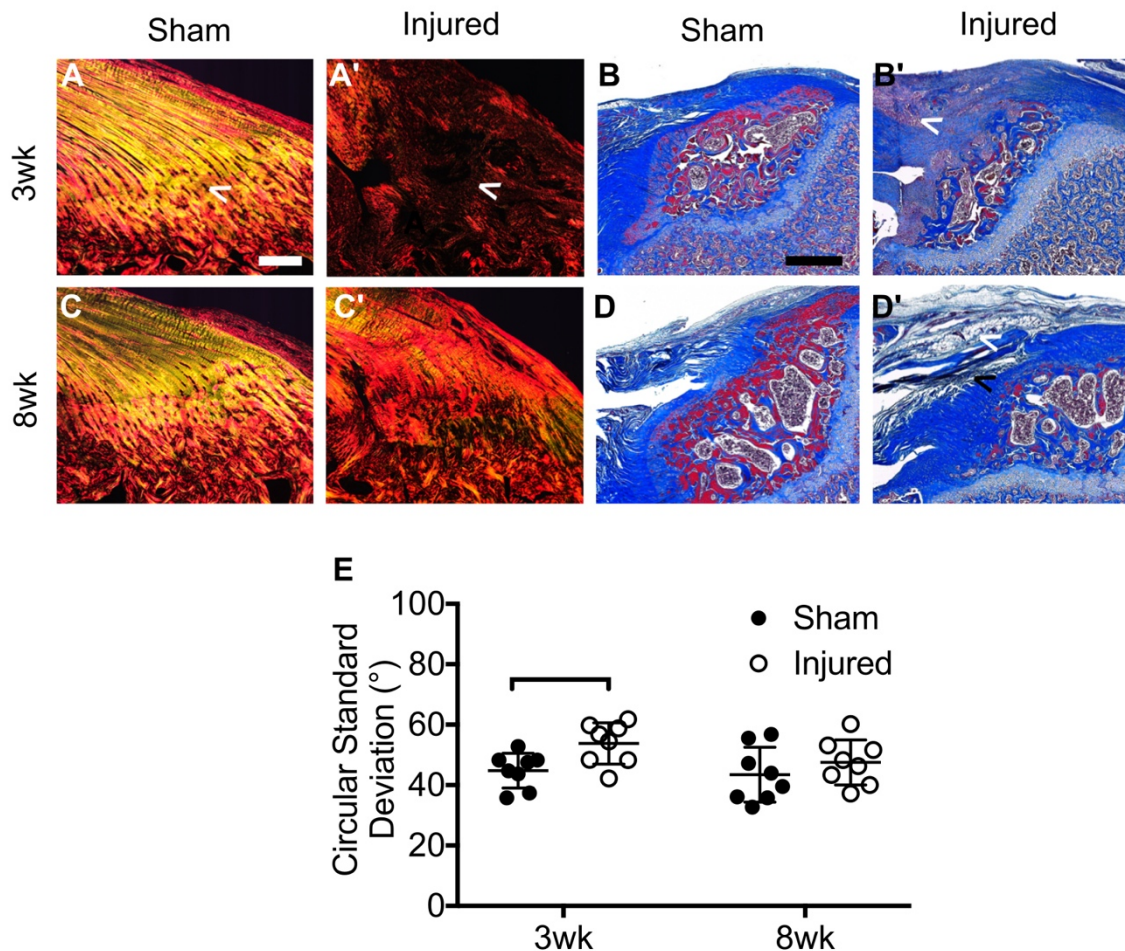

565

566 Figure 3. Organization at the IS attachment was impaired in 3wk injured attachments  
567 compared to 3wk sham attachments. (A-C') Transverse histology stained with Picosirius Red of  
568 (A) 3wk sham, (A') 3wk injured, (C) 8wk sham, and (C') 8wk injured. (B-D') Transverse  
569 histology stained with Masson's Trichrome of (B) 3wk sham, (B') 3wk injured, (D) 8wk sham,  
570 and (D') 8wk injured. White arrowheads in A & A' highlight regions of organized collagen,  
571 with (A) sham attachments having noticeably more organized collagen compared to (A') injured  
572 attachments. White arrowheads in B' highlights ECM deposition at the injured IS attachment, as  
573 well as (D') fatty accumulation in the tendon. Black arrowhead in (D') highlights fibrosis at the  
574 injured attachment. (E) Circular Standard Deviation (quantification of collagen fibril alignment)  
575 was significantly increased for 3wk injured attachments compared to sham. Bars indicate  
576 significant differences between groups ( $p < 0.05$ , mean  $\pm$  95% CI). Images taken at 5X  
577 magnification, scale bar: 200 $\mu$ m.

578

579

580

581

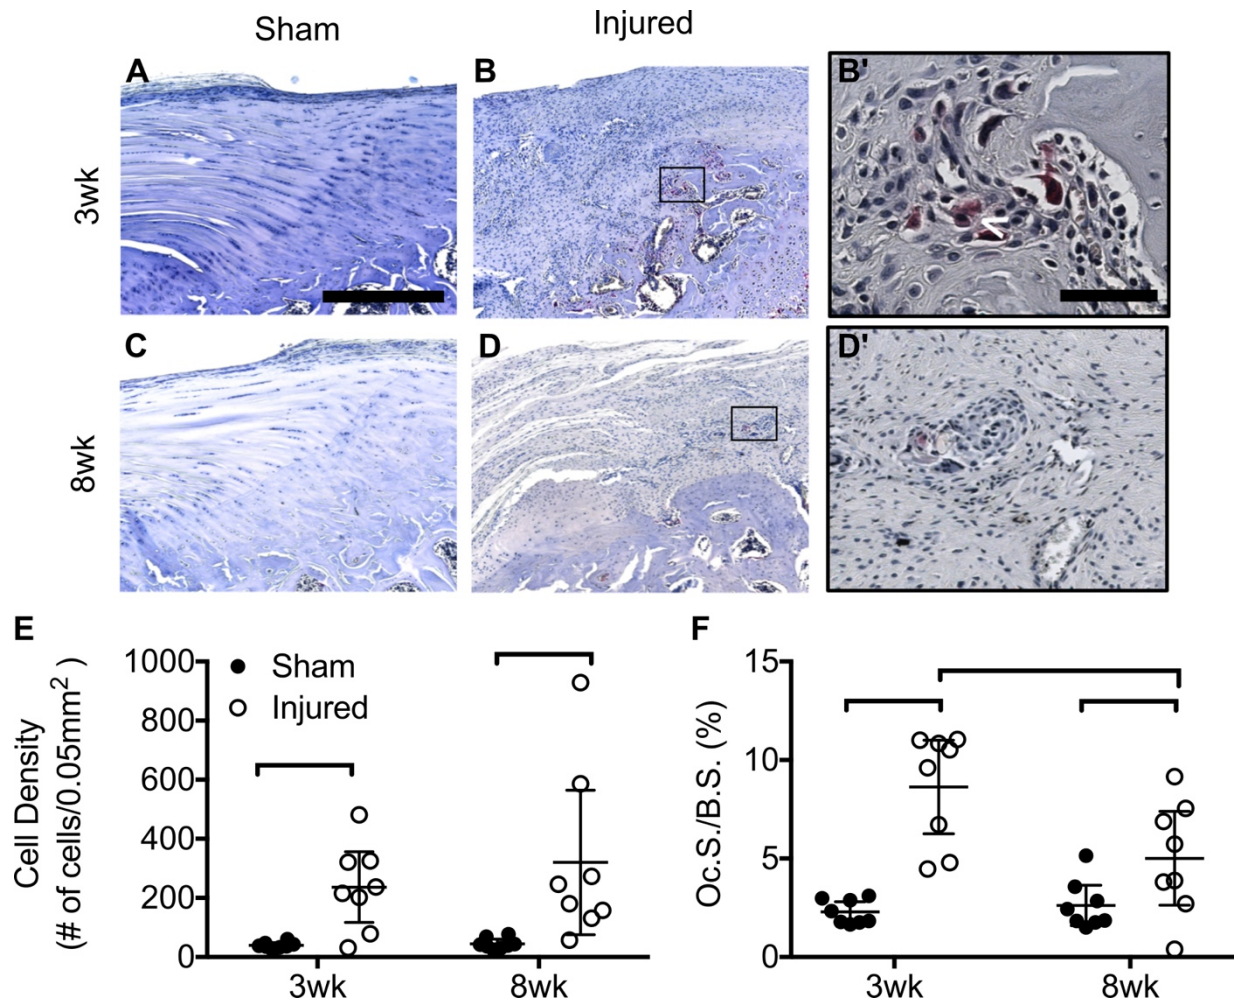

582

583 Figure 4. Cell Density and Oc.S./B.S. ratio was significantly greater in the injured attachments  
584 compared to the sham-operated attachments for both time points. (A-D) Transverse histological  
585 images at 5x-magnification of (A) 3wk sham, (B) 3wk injured, (C) 8wk sham, and (D) 8wk  
586 injured. Scale bar: 200 $\mu$ m. (B'-D') 20x-magnification of (B') 3wk injured and (D') 8wk injured.  
587 Scale bar: 30 $\mu$ m. (E) Cell density and (F) Osteoclast surface (Oc.S.) to bone surface (B.S.) ratio.  
588 Bars indicate significant differences between groups ( $p < 0.05$ , mean  $\pm$  95% CI).

589

590

591

592

593

594
